# Supplementary material for: Congenital lung abnormalities on magnetic resonance imaging: the CLAM study
Source: Springer Nature journal article supplement (doi:10.1007/s00330-023-09458-7), 2023-02-24
Supplement: MOESM1 [file 24063344]

## Online supplement 1: MRI protocol

| Sequence                                   | SPGR<br>inspiration/<br>expiration | FS T2<br>weighted<br>PROPELL<br>ER | ZTE                              | MRA Fiesta                              |
|--------------------------------------------|------------------------------------|------------------------------------|----------------------------------|-----------------------------------------|
| Acquisition plane                          | Sagittal                           | Axial                              | Axial                            | Coronal                                 |
| TR/TE (ms)                                 | 1.5/0.6                            | *73                                | 1.1/0                            | 3.6/1.1                                 |
| flip angle (°)                             | 2                                  | 90/120                             | 2                                | 50                                      |
| RF                                         | Selective                          | Selective                          | Non-selective                    | Selective                               |
| In-plane matrix                            | 120x120                            | 340x340                            | 200x200                          | 220x220                                 |
| k-space trajectory                         | Cartesian                          | BLADES                             | Radial                           | Cartesian                               |
| In-plane Field-of-view (FOV)               | 36                                 | 34                                 | 30                               | 40                                      |
| RecFOV                                     | 0.75                               | -                                  | -                                | -                                       |
| Actual voxel resolution (mm <sup>3</sup> ) | 3.0x3.0x3.0                        | 1.0x1.0x3.5                        | 1.5x1.5x1.5                      | 1.8x1.8x1.8                             |
| Slices                                     | 90 (as in VIBE)                    | 50-70                              | 200                              | 60-80                                   |
| Slice thickness                            | 3.0                                | 3.5                                | 1.5                              | 1.8                                     |
| Receiver bandwidth (KHz)                   | 90                                 | 83.33                              | 62.5                             | 100                                     |
| Parallel imaging                           | ARC (1.5x1.2)                      | 3.0                                | None                             | Asset (2.0)                             |
| Number of average                          | 1                                  | 2.0                                | 2.5                              | 1                                       |
| No. of spokes per segment                  | -                                  | 14                                 | 512                              | 150-180 ms                              |
| Physiological triggering                   | BH                                 | Prospective pencil beam navigator  | Prospective projection navigator | Respiratory gated and cardiac triggered |
| Scan time (sec) RR=20                      | +/- 6sec                           | +/- 5 min                          | +/- 6 min                        | +/- 6 min                               |

**Online supplement 1: MRI protocol.** FOV; Field Of View, FS: fat suppressed, NEX; Number of Excitations, PROPELLER; Periodically Overlapping Parallel Lines with Enhanced Reconstruction, RF; radio frequency, SPGR; Spoiled Gradient Echo Sequence, TE; Echo Time, TR; Repetition Time. \* TR chosen depended on the respiratory frequency of the patient.

## Online supplement 2:

### Online supplement 2A: Structured CT report

| Structured CT report Congenital Lung Abnormalities                                                                                                                                                                                                                                                                                                                                                                                                                                                                                                                                                                                                                                    |     |     |     |                                                                                                                                                                                                                                                                                                                                                                                                                                                                                                                                                                                                                                                                                                                                                  |     |     |     |     |     |             |     |     |        |  |  |                                             |  |  |                                          |  |  |                                                                                                                                             |  |  |  |  |  |                                          |  |  |  |  |  |                                                                                                                                               |  |  |
|---------------------------------------------------------------------------------------------------------------------------------------------------------------------------------------------------------------------------------------------------------------------------------------------------------------------------------------------------------------------------------------------------------------------------------------------------------------------------------------------------------------------------------------------------------------------------------------------------------------------------------------------------------------------------------------|-----|-----|-----|--------------------------------------------------------------------------------------------------------------------------------------------------------------------------------------------------------------------------------------------------------------------------------------------------------------------------------------------------------------------------------------------------------------------------------------------------------------------------------------------------------------------------------------------------------------------------------------------------------------------------------------------------------------------------------------------------------------------------------------------------|-----|-----|-----|-----|-----|-------------|-----|-----|--------|--|--|---------------------------------------------|--|--|------------------------------------------|--|--|---------------------------------------------------------------------------------------------------------------------------------------------|--|--|--|--|--|------------------------------------------|--|--|--|--|--|-----------------------------------------------------------------------------------------------------------------------------------------------|--|--|
| <b>Scan protocol:</b><br><input type="checkbox"/> Inspiration <input type="checkbox"/> Volumetric   Slice thickness:   mm<br><input type="checkbox"/> Expiration <input type="checkbox"/> Volumetric   Slice thickness:   mm                                                                                                                                                                                                                                                                                                                                                                                                                                                          |     |     |     | <b>Contrast enhancement:</b><br><input type="checkbox"/> None<br><input type="checkbox"/> Venous phase<br><input type="checkbox"/> Arterial phase                                                                                                                                                                                                                                                                                                                                                                                                                                                                                                                                                                                                |     |     |     |     |     |             |     |     |        |  |  |                                             |  |  |                                          |  |  |                                                                                                                                             |  |  |  |  |  |                                          |  |  |  |  |  |                                                                                                                                               |  |  |
| <b>A. Findings:</b>                                                                                                                                                                                                                                                                                                                                                                                                                                                                                                                                                                                                                                                                   |     |     |     |                                                                                                                                                                                                                                                                                                                                                                                                                                                                                                                                                                                                                                                                                                                                                  |     |     |     |     |     |             |     |     |        |  |  |                                             |  |  |                                          |  |  |                                                                                                                                             |  |  |  |  |  |                                          |  |  |  |  |  |                                                                                                                                               |  |  |
| <b>Location &amp; extent:</b><br><table border="1" style="width: 100%; border-collapse: collapse; text-align: center;"> <thead> <tr> <th style="width: 15%;"></th> <th style="width: 10%;">RUL</th> <th style="width: 10%;">RML</th> <th style="width: 10%;">RLL</th> <th style="width: 10%;">LUL</th> <th style="width: 10%;">LLL</th> </tr> </thead> <tbody> <tr> <td>Extent</td> <td></td> <td></td> <td></td> <td></td> <td></td> </tr> <tr> <td colspan="6">1= 1/3 lobe   2= 2/3 lobe   3=complete lobe</td> </tr> </tbody> </table>                                                                                                                                             |     |     |     |                                                                                                                                                                                                                                                                                                                                                                                                                                                                                                                                                                                                                                                                                                                                                  | RUL | RML | RLL | LUL | LLL | Extent      |     |     |        |  |  | 1= 1/3 lobe   2= 2/3 lobe   3=complete lobe |  |  |                                          |  |  | <b>Airway:</b><br><input type="checkbox"/> Normal connection<br><input type="checkbox"/> Bronchomalacia<br><input type="checkbox"/> Atresia |  |  |  |  |  |                                          |  |  |  |  |  |                                                                                                                                               |  |  |
|                                                                                                                                                                                                                                                                                                                                                                                                                                                                                                                                                                                                                                                                                       | RUL | RML | RLL | LUL                                                                                                                                                                                                                                                                                                                                                                                                                                                                                                                                                                                                                                                                                                                                              | LLL |     |     |     |     |             |     |     |        |  |  |                                             |  |  |                                          |  |  |                                                                                                                                             |  |  |  |  |  |                                          |  |  |  |  |  |                                                                                                                                               |  |  |
| Extent                                                                                                                                                                                                                                                                                                                                                                                                                                                                                                                                                                                                                                                                                |     |     |     |                                                                                                                                                                                                                                                                                                                                                                                                                                                                                                                                                                                                                                                                                                                                                  |     |     |     |     |     |             |     |     |        |  |  |                                             |  |  |                                          |  |  |                                                                                                                                             |  |  |  |  |  |                                          |  |  |  |  |  |                                                                                                                                               |  |  |
| 1= 1/3 lobe   2= 2/3 lobe   3=complete lobe                                                                                                                                                                                                                                                                                                                                                                                                                                                                                                                                                                                                                                           |     |     |     |                                                                                                                                                                                                                                                                                                                                                                                                                                                                                                                                                                                                                                                                                                                                                  |     |     |     |     |     |             |     |     |        |  |  |                                             |  |  |                                          |  |  |                                                                                                                                             |  |  |  |  |  |                                          |  |  |  |  |  |                                                                                                                                               |  |  |
| <b>B. Lesion:</b>                                                                                                                                                                                                                                                                                                                                                                                                                                                                                                                                                                                                                                                                     |     |     |     |                                                                                                                                                                                                                                                                                                                                                                                                                                                                                                                                                                                                                                                                                                                                                  |     |     |     |     |     |             |     |     |        |  |  |                                             |  |  |                                          |  |  |                                                                                                                                             |  |  |  |  |  |                                          |  |  |  |  |  |                                                                                                                                               |  |  |
| <b>Cystic tissue:</b><br><ul style="list-style-type: none"> <li>▪ Structure:               <ul style="list-style-type: none"> <li><input type="checkbox"/> Dominant cyst   <input type="checkbox"/> Cluster of multiple uniform cysts</li> </ul> </li> <li>▪ Average cyst size:        mm</li> <li>▪ Size of largest cyst:       mm</li> <li>▪ Content:               <ul style="list-style-type: none"> <li><input type="checkbox"/> Air-filled</li> <li><input type="checkbox"/> Fluid-filled</li> <li><input type="checkbox"/> Air-Fluid levels</li> </ul> </li> </ul>                                                                                                             |     |     |     | <b>Solid tissue:</b><br><table border="1" style="width: 100%; border-collapse: collapse; text-align: center;"> <thead> <tr> <th style="width: 15%;"></th> <th style="width: 10%;">RUL</th> <th style="width: 10%;">RML</th> <th style="width: 10%;">RLL</th> <th style="width: 10%;">LUL</th> <th style="width: 10%;">LLL</th> </tr> </thead> <tbody> <tr> <td>Extent</td> <td></td> <td></td> <td></td> <td></td> <td></td> </tr> <tr> <td colspan="6">1= 1/3 lobe   2= 2/3 lobe   3=whole lobe</td> </tr> </tbody> </table> <ul style="list-style-type: none"> <li>▪ Density:               <ul style="list-style-type: none"> <li><input type="checkbox"/> Homogeneous</li> <li><input type="checkbox"/> Heterogeneous</li> </ul> </li> </ul> |     |     |     | RUL | RML | RLL         | LUL | LLL | Extent |  |  |                                             |  |  | 1= 1/3 lobe   2= 2/3 lobe   3=whole lobe |  |  |                                                                                                                                             |  |  |  |  |  |                                          |  |  |  |  |  |                                                                                                                                               |  |  |
|                                                                                                                                                                                                                                                                                                                                                                                                                                                                                                                                                                                                                                                                                       | RUL | RML | RLL | LUL                                                                                                                                                                                                                                                                                                                                                                                                                                                                                                                                                                                                                                                                                                                                              | LLL |     |     |     |     |             |     |     |        |  |  |                                             |  |  |                                          |  |  |                                                                                                                                             |  |  |  |  |  |                                          |  |  |  |  |  |                                                                                                                                               |  |  |
| Extent                                                                                                                                                                                                                                                                                                                                                                                                                                                                                                                                                                                                                                                                                |     |     |     |                                                                                                                                                                                                                                                                                                                                                                                                                                                                                                                                                                                                                                                                                                                                                  |     |     |     |     |     |             |     |     |        |  |  |                                             |  |  |                                          |  |  |                                                                                                                                             |  |  |  |  |  |                                          |  |  |  |  |  |                                                                                                                                               |  |  |
| 1= 1/3 lobe   2= 2/3 lobe   3=whole lobe                                                                                                                                                                                                                                                                                                                                                                                                                                                                                                                                                                                                                                              |     |     |     |                                                                                                                                                                                                                                                                                                                                                                                                                                                                                                                                                                                                                                                                                                                                                  |     |     |     |     |     |             |     |     |        |  |  |                                             |  |  |                                          |  |  |                                                                                                                                             |  |  |  |  |  |                                          |  |  |  |  |  |                                                                                                                                               |  |  |
| <b>C. Border:</b>                                                                                                                                                                                                                                                                                                                                                                                                                                                                                                                                                                                                                                                                     |     |     |     |                                                                                                                                                                                                                                                                                                                                                                                                                                                                                                                                                                                                                                                                                                                                                  |     |     |     |     |     |             |     |     |        |  |  |                                             |  |  |                                          |  |  |                                                                                                                                             |  |  |  |  |  |                                          |  |  |  |  |  |                                                                                                                                               |  |  |
| <input type="checkbox"/> Well-defined <input type="checkbox"/> Ill-defined                                                                                                                                                                                                                                                                                                                                                                                                                                                                                                                                                                                                            |     |     |     |                                                                                                                                                                                                                                                                                                                                                                                                                                                                                                                                                                                                                                                                                                                                                  |     |     |     |     |     |             |     |     |        |  |  |                                             |  |  |                                          |  |  |                                                                                                                                             |  |  |  |  |  |                                          |  |  |  |  |  |                                                                                                                                               |  |  |
| <b>D. Vascularization:</b>                                                                                                                                                                                                                                                                                                                                                                                                                                                                                                                                                                                                                                                            |     |     |     |                                                                                                                                                                                                                                                                                                                                                                                                                                                                                                                                                                                                                                                                                                                                                  |     |     |     |     |     |             |     |     |        |  |  |                                             |  |  |                                          |  |  |                                                                                                                                             |  |  |  |  |  |                                          |  |  |  |  |  |                                                                                                                                               |  |  |
| <b>Arterial:</b><br><input type="checkbox"/> Normal pulmonary<br><input type="checkbox"/> Aberrant :<br><div style="display: flex; justify-content: space-between; width: 80%; margin-left: 20px;"> <span>Number &amp; Size:</span> <span>Origin:</span> </div>                                                                                                                                                                                                                                                                                                                                                                                                                       |     |     |     | <b>Venous:</b><br><input type="checkbox"/> Normal pulmonary<br><input type="checkbox"/> Aberrant :<br><div style="display: flex; justify-content: space-between; width: 80%; margin-left: 20px;"> <span>Number &amp; Size:</span> <span>Origin:</span> </div>                                                                                                                                                                                                                                                                                                                                                                                                                                                                                    |     |     |     |     |     |             |     |     |        |  |  |                                             |  |  |                                          |  |  |                                                                                                                                             |  |  |  |  |  |                                          |  |  |  |  |  |                                                                                                                                               |  |  |
| <b>E. (Surrounding) tissue:</b>                                                                                                                                                                                                                                                                                                                                                                                                                                                                                                                                                                                                                                                       |     |     |     |                                                                                                                                                                                                                                                                                                                                                                                                                                                                                                                                                                                                                                                                                                                                                  |     |     |     |     |     |             |     |     |        |  |  |                                             |  |  |                                          |  |  |                                                                                                                                             |  |  |  |  |  |                                          |  |  |  |  |  |                                                                                                                                               |  |  |
| <table border="1" style="width: 100%; border-collapse: collapse; text-align: center;"> <thead> <tr> <th style="width: 15%;"></th> <th style="width: 10%;">RUL</th> <th style="width: 10%;">RML</th> <th style="width: 10%;">RLL</th> <th style="width: 10%;">LUL</th> <th style="width: 10%;">LLL</th> </tr> </thead> <tbody> <tr> <td>Atelectasis</td> <td></td> <td></td> <td></td> <td></td> <td></td> </tr> <tr> <td>Low-attenuation</td> <td></td> <td></td> <td></td> <td></td> <td></td> </tr> <tr> <td>Hyperinflation</td> <td></td> <td></td> <td></td> <td></td> <td></td> </tr> <tr> <td colspan="6">1= 1/3 lobe   2= 2/3 lobe   3=whole lobe</td> </tr> </tbody> </table> |     |     |     |                                                                                                                                                                                                                                                                                                                                                                                                                                                                                                                                                                                                                                                                                                                                                  | RUL | RML | RLL | LUL | LLL | Atelectasis |     |     |        |  |  | Low-attenuation                             |  |  |                                          |  |  | Hyperinflation                                                                                                                              |  |  |  |  |  | 1= 1/3 lobe   2= 2/3 lobe   3=whole lobe |  |  |  |  |  | <input type="checkbox"/> Mass effect<br><br><input type="checkbox"/> Mediastinal shift<br><br><input type="checkbox"/> Mediastinal herniation |  |  |
|                                                                                                                                                                                                                                                                                                                                                                                                                                                                                                                                                                                                                                                                                       | RUL | RML | RLL | LUL                                                                                                                                                                                                                                                                                                                                                                                                                                                                                                                                                                                                                                                                                                                                              | LLL |     |     |     |     |             |     |     |        |  |  |                                             |  |  |                                          |  |  |                                                                                                                                             |  |  |  |  |  |                                          |  |  |  |  |  |                                                                                                                                               |  |  |
| Atelectasis                                                                                                                                                                                                                                                                                                                                                                                                                                                                                                                                                                                                                                                                           |     |     |     |                                                                                                                                                                                                                                                                                                                                                                                                                                                                                                                                                                                                                                                                                                                                                  |     |     |     |     |     |             |     |     |        |  |  |                                             |  |  |                                          |  |  |                                                                                                                                             |  |  |  |  |  |                                          |  |  |  |  |  |                                                                                                                                               |  |  |
| Low-attenuation                                                                                                                                                                                                                                                                                                                                                                                                                                                                                                                                                                                                                                                                       |     |     |     |                                                                                                                                                                                                                                                                                                                                                                                                                                                                                                                                                                                                                                                                                                                                                  |     |     |     |     |     |             |     |     |        |  |  |                                             |  |  |                                          |  |  |                                                                                                                                             |  |  |  |  |  |                                          |  |  |  |  |  |                                                                                                                                               |  |  |
| Hyperinflation                                                                                                                                                                                                                                                                                                                                                                                                                                                                                                                                                                                                                                                                        |     |     |     |                                                                                                                                                                                                                                                                                                                                                                                                                                                                                                                                                                                                                                                                                                                                                  |     |     |     |     |     |             |     |     |        |  |  |                                             |  |  |                                          |  |  |                                                                                                                                             |  |  |  |  |  |                                          |  |  |  |  |  |                                                                                                                                               |  |  |
| 1= 1/3 lobe   2= 2/3 lobe   3=whole lobe                                                                                                                                                                                                                                                                                                                                                                                                                                                                                                                                                                                                                                              |     |     |     |                                                                                                                                                                                                                                                                                                                                                                                                                                                                                                                                                                                                                                                                                                                                                  |     |     |     |     |     |             |     |     |        |  |  |                                             |  |  |                                          |  |  |                                                                                                                                             |  |  |  |  |  |                                          |  |  |  |  |  |                                                                                                                                               |  |  |
| <b>F. Conclusion</b>                                                                                                                                                                                                                                                                                                                                                                                                                                                                                                                                                                                                                                                                  |     |     |     |                                                                                                                                                                                                                                                                                                                                                                                                                                                                                                                                                                                                                                                                                                                                                  |     |     |     |     |     |             |     |     |        |  |  |                                             |  |  |                                          |  |  |                                                                                                                                             |  |  |  |  |  |                                          |  |  |  |  |  |                                                                                                                                               |  |  |
| <input type="checkbox"/> CPAM<br><input type="checkbox"/> BPS                                                                                                                                                                                                                                                                                                                                                                                                                                                                                                                                                                                                                         |     |     |     |                                                                                                                                                                                                                                                                                                                                                                                                                                                                                                                                                                                                                                                                                                                                                  |     |     |     |     |     |             |     |     |        |  |  |                                             |  |  |                                          |  |  |                                                                                                                                             |  |  |  |  |  |                                          |  |  |  |  |  |                                                                                                                                               |  |  |

- Hybrid lesion
- CLO
- BA
- BC

## Online supplement 2B: Structured MRI report

### Structured MRI report Congenital Lung Abnormalities

#### A. Findings:

##### Location & extent:

|                                               | RUL | RML | RLL | LUL | LLL |
|-----------------------------------------------|-----|-----|-----|-----|-----|
| Extent                                        |     |     |     |     |     |
| 1= 1/3 lobe    2= 2/3 lobe    3=complete lobe |     |     |     |     |     |

##### Airway:

- Normal connection
- Bronchomalacia
- Atresia
- Not clearly visible

##### On which sequence was the airway best visualized:

- SPGR inspiration
- SPGR expiration
- T2-w PROPELLER
- ZTE
- Other, namely...

#### B. Lesion:

##### Cystic tissue:

- Structure:
  - Dominant cyst
  - Cluster of multiple uniform cysts
  - Not clearly visible
- Average cyst size:        mm
- Size of largest cyst:     mm
- Content:
  - Air-filled
  - Fluid-filled
  - Air-Fluid levels
  - Not clearly visible

##### On which sequence was the cyst(s) best visualized:

- SPGR inspiration
- SPGR expiration
- T2-w PROPELLER
- ZTE
- Other, namely...

##### Solid tissue:

|                                            | RUL | RML | RLL | LUL | LLL |
|--------------------------------------------|-----|-----|-----|-----|-----|
| Extent                                     |     |     |     |     |     |
| 1= 1/3 lobe    2= 2/3 lobe    3=whole lobe |     |     |     |     |     |

- Density:
  - Homogeneous
  - Heterogeneous

##### On which sequence was the solid tissue best visualized:

- SPGR inspiration
- SPGR expiration
- T2-w PROPELLER
- ZTE
- Other, namely...

C. Border:

- Well-defined     Ill-defined     Not clearly visible

On which sequence was the lesion border best visualized:

- SPGR inspiration  
 SPGR expiration  
 T2-w PROPELLER  
 ZTE  
 Other, namely...

D. Vascularization:

- Normal pulmonary  
 Aberrant :  
                    Number & Size:            Origin:

On which sequence was the vascularization best visualized:

- SPGR inspiration  
 SPGR expiration  
 T2-w PROPELLER  
 ZTE  
 MRA

E. (Surrounding) tissue:

|                                                   | RUL | RML | RLL | LUL | LLL |
|---------------------------------------------------|-----|-----|-----|-----|-----|
| Atelectasis                                       |     |     |     |     |     |
| Low-attenuation                                   |     |     |     |     |     |
| Hyperinflation                                    |     |     |     |     |     |
| <i>1= 1/3 lobe    2= 2/3 lobe    3=whole lobe</i> |     |     |     |     |     |

- Mass effect  
  
 Mediastinal shift  
  
 Mediastinal herniation

On which sequence was atelectasis best visualized:

- SPGR inspiration  
 SPGR expiration  
 T2-w PROPELLER  
 ZTE  
 Other, namely...

On which sequence was low-attenuation best visualized:

- SPGR inspiration  
 SPGR expiration  
 T2-w PROPELLER  
 ZTE  
 Other, namely...

On which sequence was hyperinflation best visualized:

- SPGR inspiration
- SPGR expiration
- T2-w PROPELLER
- ZTE
- Other, namely...

#### F. Conclusion

- Post- surgical CLA
- CPAM
- BPS
- Hybrid lesion
- CLO
- BA
- BC

### Online supplement 3: Qualitative scoring method

|                                            |                                                                                                                                                                                                                                                                                                                                                                                                                                                                                                                     |
|--------------------------------------------|---------------------------------------------------------------------------------------------------------------------------------------------------------------------------------------------------------------------------------------------------------------------------------------------------------------------------------------------------------------------------------------------------------------------------------------------------------------------------------------------------------------------|
| <b>Depiction of fissures</b>               | <ol style="list-style-type: none"><li>1. Unacceptable (invisible interlobar fissure)</li><li>2. Fair (blurred interlobar fissure)</li><li>3. Good (visible interlobar fissure)</li></ol>                                                                                                                                                                                                                                                                                                                            |
| <b>Depiction of intrapulmonary vessels</b> | <ol style="list-style-type: none"><li>1. Unacceptable (invisible peripheral pulmonary vessels)</li><li>2. Poor (barely visible peripheral pulmonary vessels)</li><li>3. Fair (visible peripheral pulmonary vessels)</li><li>4. Good (visible peripheral pulmonary vessels with clear margin)</li><li>5. Excellent (visible peripheral pulmonary vessels with clear margin)</li></ol>                                                                                                                                |
| <b>Depiction of bronchi</b>                | <ol style="list-style-type: none"><li>1. Unacceptable (indistinguishable lobar bronchial walls)</li><li>2. Poor (visible lobar bronchial walls with &lt;10 visible segmental bronchial walls)</li><li>3. Fair (visible lobar bronchial walls with &gt;10 visible segmental bronchial walls)</li><li>4. Good (visible lobar bronchial walls with &gt;10 visible segmental bronchial walls, with few visible sub/segmental bronchial walls)</li><li>5. Excellent (visible sub-subsegmental bronchial walls)</li></ol> |
| <b>Image noise/artifacts</b>               | <ol style="list-style-type: none"><li>1. Unacceptable</li><li>2. Above average noise/artifacts</li><li>3. Average and acceptable</li><li>4. Less than average noise/ artifacts</li><li>5. Minimum of no noise/artifacts</li></ol>                                                                                                                                                                                                                                                                                   |
| <b>Overall acceptability</b>               | <ol style="list-style-type: none"><li>1. Unacceptable</li><li>2. Suboptimal</li><li>3. Satisfactory</li><li>4. Above average</li><li>5. Superior</li></ol>                                                                                                                                                                                                                                                                                                                                                          |

**Online supplement 3:** Qualitative scoring method adjusted from Bae *et al.* (European Radiology 2020)
